# Supplementary material
Source: Springer Nature journal article supplement (https://www.springermedizin.de/resource/supplementary/12889_2005_384_MOESM1_ESM.pdf/9501460)
Supplement: MOESM1 [file 9501460]

**16519 Patients**  
Acute and Rehabilitation Hospitals

Complete Information regarding  
age, sex, date of fracture, fracture  
site, without double data

**14551 Patients**  
8606 Reha and 5945 Acute  
11238 Female and 3313 Male

**12520 Patients Femur Fract.**  
**(3914 Acute and 8606 Reha)**  
9580 F and 2940 M

**2031 Patients isolated  
Forearm Fract. (Acute Hosp.)**  
1658 F and 373 M

119 died in Hospital

**14429 Patients**  
Discharged  
5839 A and 8590 R  
11153 F and 3276 M

3 died in Hospital

**12401 Patients**  
3811 Acute and 8590 Reha  
9498 F and 2903 M

**2028 Patients**  
Potential Interview Participants  
1655 F and 373 M

6682 without reply or  
cooperativeness

994 without reply or  
cooperativeness

1463 died after discharge  
1070 F and 393 M

60 died after discharge  
54 F and 6 M

**4256 Interviews**  
3695 Self + 561 Not-Self

**5230 Patients**  
Telephone-Interview  
3929 F and 1301 M

**974 Interviews**  
784 F and 190 M

**3247 Patients**  
Reha  
2425 F and 822 M

**181 Patients**  
Reha + Acute  
133 F and 48 M

**828 Patients**  
Acute  
587 F and 241 M

**974 Patients**  
Acute

**2879**  
Self-Rating  
2131F + 748M

**368**  
Rating by  
others  
294 F + 74 M

**166**  
Self-Rating  
123 F + 43 M

**15**  
Rating by  
others  
10 F + 5 M

**650**  
Self-Rating  
444F + 206M

**178**  
Rating by  
others  
143 F + 35 M

**974**  
Self-Rating  
784F + 190M
